# Supplementary material for: Lactobacillus acidophilus Expressing Murine Rotavirus VP8 and Mucosal Adjuvants Induce Virus-Specific Immune Responses
Source: Vaccines (Basel). 2023 Nov 28;11(12):1774. doi: 10.3390/vaccines11121774 (PMC10747613; doi:10.3390/vaccines11121774)
Supplement: Supplementary file 1 [file vaccines-11-01774-s001.zip › Gilfillan-Vilander-etal_SupplementaryMaterials_TablesS1-S13.xlsx]

## Sheet: Table S1
Bacterial Strain	Plasmid	Resistance	Description	Reference
EC101		Kan	E. coli cloning host, repA +	Law et al. 1995.
NCK1910	pTRK669	Cm	L. acidophilus NCFM with non-functional upp	Goh et al. 2009
GAD80	pTRK669	Cm	Recombinant L. acidophilus with VP8Pep surface display	Vilander et al. 2023
NCK2753			Recombinant L. acidophilus with VP8Pep surface display, FimH downstream of lba0889	This study
NCK2783			Recombinant L. acidophilus with VP8Pep surface display, VP8-1 and FimH downstream of lba0889	This study

## Sheet: Table S2
Antigen	Sequence	Expresion	Reference
VP8Pep	MASLIYRQLL	Surface (SlpA)	Xue et al. 2015
VP8-1	GAEKT QNVTVNPGPF AQTGYAPANW GPGETNDSTT VEPVLDGPYQ PIAFSPPPEY YILLSPTAPG VIAECTNTVN RWIAIIAIEP NVSPTNRTYT LFGITEQLTV ENSSVDKWKF IDFMKTPTTG SYVRYNILLS STKLCAVAKH TDNLYSYVGE TPTAGQAYYS SFNIFNLTAH CDFYIIPWSQ QSLCTQYVNN GLPPIQNTRN V	Cytoplasmic	Xue et al. 2015

## Sheet: Table S3
Primer	Sequence
AK_63	TTT TAA GCT TCA TCT GAG GAT AAA GTT GTT TGA T
AV_49	CAA GAA GCT GTC TAT AAA TCA AAC TGG CCA TAC CGG TGA ATT TTA CAT TT
AK_64	TTT TGG ATC CGA ATC GAA GTA TCA GAA GAT CC
AV_50	GCT TCT TGC AAA CAG TGA TAA TCA AAC
AV_06	TGG TCG ACA AGC AGG TCT TC
AV_09	CTG TAA AGG CAG ATG AAG TTG ATG
NEB_fimH_fwd	GTTGAAATTGTACTCGGTGCTTATCTCCGTTTCCTATCAG
NEB_fimH_rev	ATGTTGACCACGATTAATGCGGCTGAATTCAGGAGTTAATAATATG
upp_fwd	GGGCTGGCTTAACTATGC
upp_rev	CTTCCGGCTCGTATGTTG
repA-fwd	TCAGGTTATGACCATCTGTGC
repA-rev	CTCCGTCGCTATTGTAACCAG
889_fwd	GTTGTTGTTCCTGTAGGTAAGATTG
889_rev	CCACACTTTGAAGAAGGTTCTTG
FimH_flanking_fwd	CAACTGTTGGGAAGGGCGATAGCGATCAAGCTTCCGGC
FimH_flanking_rev	TAACGTTTAAATGCGGCTGAATTCAGGAGT

## Sheet: Table S4
Plasmid	Components	Resistance	Reference
pTRK669	Temperature-sensitive helper plasmid; RepA+	Cm	Goh et al. 2009
pTRK-AV04	FimH no tag	Ery	Vilander et al. 2023
pTRK-AV05	SlpA-VP8Pep		Vilander et al. 2023
pTRK1034	FliC	Ery	Kajikawa et al. 2011
pTRK1038	Integration plasmid containing 600bp upstream and 600bp downstream sequence flanking the lba0889 (enolase) integration site	Ery	Douglas et al. 2011
pTRK1053	SlpA	Ery	Kajikawa et al. 2015
pTRK1209	pTRK1038 containing FimH cassette between the upstream and downstream sequence flanking the lba0889 integration site	Ery	This study
pTRK1213	pTRK1038 containing VP8-1 between the upstream and downstream sequence flanking the integration site between lba0889 and chromosomal FimH cassette	Ery	This study

## Sheet: Table S5
Primary Antibody/Dilution	Manufacturer	Secondary Antibody/Dilution	Manufacturer
Rabbit anti-VP810AA Antibody (1:200)	Genscript (Piscataway, NJ, USA)	Donkey anti-rabbit FITC Clone Poly4064 (1:100)	BioLegend (San Diego, CA, USA)
Mouse anti-Salmonella FliC clone FLIC-1 (1:200)	BioLegend (San Diego, CA, USA)	Goat anti-mouse PE IgG1 (γ1) (1:100)	Invitrogen (Waltham, MA, USA)
Mouse anti-FimH mAB 824 (1:1000)	Gift from Dr. Svgeni V. Sorurenko (University of Washington, Seattle, WA)	Goat anti-mouse PE IgG1 (γ1) (1:100)	Invitrogen

## Sheet: Table S6
Lane	Lane Label	Band No.	Mol. Wt. (kDa)	Relative Front	Adj. Volume (Int)	Volume (Int)	Band %	Lane %
1	NCK56	None
3	GAD85	1	24.7358	0.730205	7507172	8239161	100	85.3339
4	MW Marker	1	250	0.184751	1795332	4063306	2.78801	2.68876
4	MW Marker	2	150	0.27566	5630872	11930600	8.7443	8.43303
4	MW Marker	3	100	0.360704	5933023	11329488	9.21352	8.88554
4	MW Marker	4	75	0.419355	7025743	10856962	10.9104	10.522
4	MW Marker	5	50	0.530792	19818658	23971139	30.7768	29.6812
4	MW Marker	6	37	0.618768	11725860	14261040	18.2093	17.5611
4	MW Marker	7	25	0.727273	5136016	7142555	7.97583	7.69191
4	MW Marker	8	20	0.788856	3016435	4420441	4.68429	4.51754
4	MW Marker	9	15	0.859481	35148	200158	0.054582	0.052639
4	MW Marker	10	10	0.912023	4277674	4649570	6.64289	6.40642
5	VP8-1 Control	1	25.6372	0.718475	1735708	2055288	100	43.5645
15	15 (MW Marker)	1	250	0.173021	1165278	2391775	2.61364	2.51713
15	15 (MW Marker)	2	150	0.260997	1800349	3876198	4.03806	3.88895
15	15 (MW Marker)	3	100	0.346041	2291493	4555929	5.13966	4.94988
15	15 (MW Marker)	4	75	0.404692	4661344	7093719	10.4551	10.069
15	15 (MW Marker)	5	50	0.516129	15137014	18084864	33.9513	32.6976
15	15 (MW Marker)	6	37	0.604106	9168930	11212038	20.5653	19.8059
15	15 (MW Marker)	7	25	0.706745	4406434	5829812	9.88332	9.51838
15	15 (MW Marker)	8	20	0.765396	2718344	3766201	6.09706	5.87192
15	15 (MW Marker)	9	15	0.83871	255664	639537	0.573436	0.552262
15	15 (MW Marker)	10	10	0.882698	2979692	3424552	6.68324	6.43646

## Sheet: Table S7
Lane	Lane Label	Band No.	Mol. Wt. (kDa)	Relative Front	Adj. Volume (Int)	Volume (Int)	Band %	Lane %
2	2 (MW Marker)	1	250	0.281977	923168	923168	15.9178	6.4963
2	2 (MW Marker)	2	150	0.392442	683604	683604	11.7871	4.8105
2	2 (MW Marker)	3	100	0.485465	233172	233172	4.0205	1.64082
2	2 (MW Marker)	4	75	0.537791	266560	266560	4.59619	1.87577
2	2 (MW Marker)	5	50	0.633721	473348	473348	8.16176	3.33093
2	2 (MW Marker)	6	37	0.72093	612272	612272	10.5572	4.30854
2	2 (MW Marker)	7	25	0.805233	1572534	1572534	27.1146	11.0659
2	2 (MW Marker)	8	20	0.84593	822732	822732	14.186	5.78953
2	2 (MW Marker)	9	15	0.94186	212194	212194	3.65878	1.4932
3	3 (VP8-1 Control)	1	51.0108	0.628986	247622	247622	1.44024	0.963329
3	3 (VP8-1 Control)	2	24.5298	0.808696	16945532	16945532	98.5598	65.9236
4	4 (GAD84)	1	24.6047	0.80814	1113670	1113670	100	11.0678
5	5 (NCK56)	None
6	6 (GAD84)	1	48.6305	0.641765	210324	210324	32.899	2.2728
6	6 (GAD84)	2	33.5833	0.741765	233648	233648	36.5474	2.52485
6	6 (GAD84)	3	26.0347	0.796512	195330	195330	30.5536	2.11077

## Sheet: Table S8
Sample Number	Normal Mice Sera	Negative Control	Buffer	NCK56	GAD84	GAD85
1	<400	<400	<400	<400	<400	<400
2	<400	<400	<400	<400	<400	<400
3	<400	<400	<400	<400	<400	<400
4	<400	<400	<400	<400	<400	<400
5		<400	<400	<400	<400	<400
6		<400	<400	<400	<400	<400
7		<400	<400	<400	<400	<400
8			<400	<400	<400	800

## Sheet: Table S9
Comparison (Spleen)	diff	lwr	upr	p.adj
NCK56:VP81_IgA-Buffer:VP81_IgA	0.386181	-8.71448	9.48684	1
GAD85:VP81_IgA-Buffer:VP81_IgA	11.8268	2.72613	20.9275	0.00199251
Buffer:VP81_IgG-Buffer:VP81_IgA	-5.85643e-15	-9.10066	9.10066	1
NCK56:VP81_IgG-Buffer:VP81_IgA	0.446565	-8.6541	9.54723	1
GAD85:VP81_IgG-Buffer:VP81_IgA	10.8206	1.71992	19.9212	0.00717466
Buffer:VP8Pep_IgA-Buffer:VP81_IgA	-5.05151e-15	-9.10066	9.10066	1
NCK56:VP8Pep_IgA-Buffer:VP81_IgA	0.121359	-8.9793	9.22202	1
GAD85:VP8Pep_IgA-Buffer:VP81_IgA	11.9793	2.87863	21.08	0.00162796
Buffer:VP8Pep_IgG-Buffer:VP81_IgA	-5.93969e-15	-9.10066	9.10066	1
NCK56:VP8Pep_IgG-Buffer:VP81_IgA	-6.38378e-15	-9.10066	9.10066	1
GAD85:VP8Pep_IgG-Buffer:VP81_IgA	2.87546	-6.2252	11.9761	0.995475
GAD85:VP81_IgA-NCK56:VP81_IgA	11.4406	2.33995	20.5413	0.00329412
Buffer:VP81_IgG-NCK56:VP81_IgA	-0.386181	-9.48684	8.71448	1
NCK56:VP81_IgG-NCK56:VP81_IgA	0.0603836	-9.04028	9.16105	1
GAD85:VP81_IgG-NCK56:VP81_IgA	10.4344	1.33374	19.5351	0.0114272
Buffer:VP8Pep_IgA-NCK56:VP81_IgA	-0.386181	-9.48684	8.71448	1
NCK56:VP8Pep_IgA-NCK56:VP81_IgA	-0.264822	-9.36548	8.83584	1
GAD85:VP8Pep_IgA-NCK56:VP81_IgA	11.5931	2.49245	20.6938	0.0027052
Buffer:VP8Pep_IgG-NCK56:VP81_IgA	-0.386181	-9.48684	8.71448	1
NCK56:VP8Pep_IgG-NCK56:VP81_IgA	-0.386181	-9.48684	8.71448	1
GAD85:VP8Pep_IgG-NCK56:VP81_IgA	2.48928	-6.61138	11.5899	0.998736
Buffer:VP81_IgG-GAD85:VP81_IgA	-11.8268	-20.9275	-2.72613	0.00199251
NCK56:VP81_IgG-GAD85:VP81_IgA	-11.3802	-20.4809	-2.27956	0.00355923
GAD85:VP81_IgG-GAD85:VP81_IgA	-1.0062	-10.1069	8.09446	1
Buffer:VP8Pep_IgA-GAD85:VP81_IgA	-11.8268	-20.9275	-2.72613	0.00199251
NCK56:VP8Pep_IgA-GAD85:VP81_IgA	-11.7054	-20.8061	-2.60477	0.00233682
GAD85:VP8Pep_IgA-GAD85:VP81_IgA	0.152502	-8.94816	9.25316	1
Buffer:VP8Pep_IgG-GAD85:VP81_IgA	-11.8268	-20.9275	-2.72613	0.00199251
NCK56:VP8Pep_IgG-GAD85:VP81_IgA	-11.8268	-20.9275	-2.72613	0.00199251
GAD85:VP8Pep_IgG-GAD85:VP81_IgA	-8.95133	-18.052	0.149333	0.0581566
NCK56:VP81_IgG-Buffer:VP81_IgG	0.446565	-8.6541	9.54723	1
GAD85:VP81_IgG-Buffer:VP81_IgG	10.8206	1.71992	19.9212	0.00717466
Buffer:VP8Pep_IgA-Buffer:VP81_IgG	8.04912e-16	-9.10066	9.10066	1
NCK56:VP8Pep_IgA-Buffer:VP81_IgG	0.121359	-8.9793	9.22202	1
GAD85:VP8Pep_IgA-Buffer:VP81_IgG	11.9793	2.87863	21.08	0.00162796
Buffer:VP8Pep_IgG-Buffer:VP81_IgG	-8.32667e-17	-9.10066	9.10066	1
NCK56:VP8Pep_IgG-Buffer:VP81_IgG	-5.27356e-16	-9.10066	9.10066	1
GAD85:VP8Pep_IgG-Buffer:VP81_IgG	2.87546	-6.2252	11.9761	0.995475
GAD85:VP81_IgG-NCK56:VP81_IgG	10.374	1.27336	19.4747	0.0122722
Buffer:VP8Pep_IgA-NCK56:VP81_IgG	-0.446565	-9.54723	8.6541	1
NCK56:VP8Pep_IgA-NCK56:VP81_IgG	-0.325206	-9.42587	8.77546	1
GAD85:VP8Pep_IgA-NCK56:VP81_IgG	11.5327	2.43206	20.6334	0.00292534
Buffer:VP8Pep_IgG-NCK56:VP81_IgG	-0.446565	-9.54723	8.6541	1
NCK56:VP8Pep_IgG-NCK56:VP81_IgG	-0.446565	-9.54723	8.6541	1
GAD85:VP8Pep_IgG-NCK56:VP81_IgG	2.42889	-6.67177	11.5296	0.998991
Buffer:VP8Pep_IgA-GAD85:VP81_IgG	-10.8206	-19.9212	-1.71992	0.00717466
NCK56:VP8Pep_IgA-GAD85:VP81_IgG	-10.6992	-19.7999	-1.59856	0.00831861
GAD85:VP8Pep_IgA-GAD85:VP81_IgG	1.15871	-7.94196	10.2594	0.999999
Buffer:VP8Pep_IgG-GAD85:VP81_IgG	-10.8206	-19.9212	-1.71992	0.00717466
NCK56:VP8Pep_IgG-GAD85:VP81_IgG	-10.8206	-19.9212	-1.71992	0.00717466
GAD85:VP8Pep_IgG-GAD85:VP81_IgG	-7.94513	-17.0458	1.15554	0.147756
NCK56:VP8Pep_IgA-Buffer:VP8Pep_IgA	0.121359	-8.9793	9.22202	1
GAD85:VP8Pep_IgA-Buffer:VP8Pep_IgA	11.9793	2.87863	21.08	0.00162796
Buffer:VP8Pep_IgG-Buffer:VP8Pep_IgA	-8.88178e-16	-9.10066	9.10066	1
NCK56:VP8Pep_IgG-Buffer:VP8Pep_IgA	-1.33227e-15	-9.10066	9.10066	1
GAD85:VP8Pep_IgG-Buffer:VP8Pep_IgA	2.87546	-6.2252	11.9761	0.995475
GAD85:VP8Pep_IgA-NCK56:VP8Pep_IgA	11.8579	2.75727	20.9586	0.00191227
Buffer:VP8Pep_IgG-NCK56:VP8Pep_IgA	-0.121359	-9.22202	8.9793	1
NCK56:VP8Pep_IgG-NCK56:VP8Pep_IgA	-0.121359	-9.22202	8.9793	1
GAD85:VP8Pep_IgG-NCK56:VP8Pep_IgA	2.7541	-6.34656	11.8548	0.996883
Buffer:VP8Pep_IgG-GAD85:VP8Pep_IgA	-11.9793	-21.08	-2.87863	0.00162796
NCK56:VP8Pep_IgG-GAD85:VP8Pep_IgA	-11.9793	-21.08	-2.87863	0.00162796
GAD85:VP8Pep_IgG-GAD85:VP8Pep_IgA	-9.10383	-18.2045	-0.00316952	0.0498382
NCK56:VP8Pep_IgG-Buffer:VP8Pep_IgG	-4.44089e-16	-9.10066	9.10066	1
GAD85:VP8Pep_IgG-Buffer:VP8Pep_IgG	2.87546	-6.2252	11.9761	0.995475
GAD85:VP8Pep_IgG-NCK56:VP8Pep_IgG	2.87546	-6.2252	11.9761	0.995475

## Sheet: Table S10
Comparison (MLN)	diff	lwr	upr	p.adj
NCK56:VP81_IgA-Buffer:VP81_IgA	0.883841	-9.21342	10.9811	1
GAD85:VP81_IgA-Buffer:VP81_IgA	1.36493	-8.73232	11.4622	0.999999
Buffer:VP81_IgG-Buffer:VP81_IgA	-3.31957e-14	-10.0973	10.0973	1
NCK56:VP81_IgG-Buffer:VP81_IgA	4.05004	-6.04721	14.1473	0.969531
GAD85:VP81_IgG-Buffer:VP81_IgA	33.6152	23.5179	43.7124	6.54082e-11
Buffer:VP8Pep_IgA-Buffer:VP81_IgA	-5.21805e-15	-10.0973	10.0973	1
NCK56:VP8Pep_IgA-Buffer:VP81_IgA	0.920706	-9.17655	11.018	1
GAD85:VP8Pep_IgA-Buffer:VP81_IgA	1.92953	-8.52212	12.3812	0.999971
Buffer:VP8Pep_IgG-Buffer:VP81_IgA	-6.55032e-15	-10.0973	10.0973	1
NCK56:VP8Pep_IgG-Buffer:VP81_IgA	3.65151	-6.44574	13.7488	0.986128
GAD85:VP8Pep_IgG-Buffer:VP81_IgA	2.26937	-8.18229	12.721	0.999856
GAD85:VP81_IgA-NCK56:VP81_IgA	0.481092	-9.61616	10.5783	1
Buffer:VP81_IgG-NCK56:VP81_IgA	-0.883841	-10.9811	9.21342	1
NCK56:VP81_IgG-NCK56:VP81_IgA	3.1662	-6.93105	13.2635	0.995719
GAD85:VP81_IgG-NCK56:VP81_IgA	32.7314	22.6341	42.8286	6.54242e-11
Buffer:VP8Pep_IgA-NCK56:VP81_IgA	-0.883841	-10.9811	9.21342	1
NCK56:VP8Pep_IgA-NCK56:VP81_IgA	0.0368653	-10.0604	10.1341	1
GAD85:VP8Pep_IgA-NCK56:VP81_IgA	1.04569	-9.40596	11.4973	1
Buffer:VP8Pep_IgG-NCK56:VP81_IgA	-0.883841	-10.9811	9.21342	1
NCK56:VP8Pep_IgG-NCK56:VP81_IgA	2.76767	-7.32959	12.8649	0.998698
GAD85:VP8Pep_IgG-NCK56:VP81_IgA	1.38552	-9.06613	11.8372	0.999999
Buffer:VP81_IgG-GAD85:VP81_IgA	-1.36493	-11.4622	8.73232	0.999999
NCK56:VP81_IgG-GAD85:VP81_IgA	2.68511	-7.41215	12.7824	0.999013
GAD85:VP81_IgG-GAD85:VP81_IgA	32.2503	22.153	42.3475	6.54329e-11
Buffer:VP8Pep_IgA-GAD85:VP81_IgA	-1.36493	-11.4622	8.73232	0.999999
NCK56:VP8Pep_IgA-GAD85:VP81_IgA	-0.444226	-10.5415	9.65303	1
GAD85:VP8Pep_IgA-GAD85:VP81_IgA	0.564603	-9.88705	11.0163	1
Buffer:VP8Pep_IgG-GAD85:VP81_IgA	-1.36493	-11.4622	8.73232	0.999999
NCK56:VP8Pep_IgG-GAD85:VP81_IgA	2.28658	-7.81068	12.3838	0.999784
GAD85:VP8Pep_IgG-GAD85:VP81_IgA	0.904433	-9.54722	11.3561	1
NCK56:VP81_IgG-Buffer:VP81_IgG	4.05004	-6.04721	14.1473	0.969531
GAD85:VP81_IgG-Buffer:VP81_IgG	33.6152	23.5179	43.7124	6.54082e-11
Buffer:VP8Pep_IgA-Buffer:VP81_IgG	2.79776e-14	-10.0973	10.0973	1
NCK56:VP8Pep_IgA-Buffer:VP81_IgG	0.920706	-9.17655	11.018	1
GAD85:VP8Pep_IgA-Buffer:VP81_IgG	1.92953	-8.52212	12.3812	0.999971
Buffer:VP8Pep_IgG-Buffer:VP81_IgG	2.66454e-14	-10.0973	10.0973	1
NCK56:VP8Pep_IgG-Buffer:VP81_IgG	3.65151	-6.44574	13.7488	0.986128
GAD85:VP8Pep_IgG-Buffer:VP81_IgG	2.26937	-8.18229	12.721	0.999856
GAD85:VP81_IgG-NCK56:VP81_IgG	29.5652	19.4679	39.6624	6.55588e-11
Buffer:VP8Pep_IgA-NCK56:VP81_IgG	-4.05004	-14.1473	6.04721	0.969531
NCK56:VP8Pep_IgA-NCK56:VP81_IgG	-3.12934	-13.2266	6.96792	0.99613
GAD85:VP8Pep_IgA-NCK56:VP81_IgG	-2.12051	-12.5722	8.33115	0.999926
Buffer:VP8Pep_IgG-NCK56:VP81_IgG	-4.05004	-14.1473	6.04721	0.969531
NCK56:VP8Pep_IgG-NCK56:VP81_IgG	-0.398531	-10.4958	9.69873	1
GAD85:VP8Pep_IgG-NCK56:VP81_IgG	-1.78068	-12.2323	8.67098	0.999987
Buffer:VP8Pep_IgA-GAD85:VP81_IgG	-33.6152	-43.7124	-23.5179	6.54082e-11
NCK56:VP8Pep_IgA-GAD85:VP81_IgG	-32.6945	-42.7917	-22.5972	6.54262e-11
GAD85:VP8Pep_IgA-GAD85:VP81_IgG	-31.6857	-42.1373	-21.234	6.54737e-11
Buffer:VP8Pep_IgG-GAD85:VP81_IgG	-33.6152	-43.7124	-23.5179	6.54082e-11
NCK56:VP8Pep_IgG-GAD85:VP81_IgG	-29.9637	-40.0609	-19.8664	6.5508e-11
GAD85:VP8Pep_IgG-GAD85:VP81_IgG	-31.3458	-41.7975	-20.8942	6.54946e-11
NCK56:VP8Pep_IgA-Buffer:VP8Pep_IgA	0.920706	-9.17655	11.018	1
GAD85:VP8Pep_IgA-Buffer:VP8Pep_IgA	1.92953	-8.52212	12.3812	0.999971
Buffer:VP8Pep_IgG-Buffer:VP8Pep_IgA	-1.33227e-15	-10.0973	10.0973	1
NCK56:VP8Pep_IgG-Buffer:VP8Pep_IgA	3.65151	-6.44574	13.7488	0.986128
GAD85:VP8Pep_IgG-Buffer:VP8Pep_IgA	2.26937	-8.18229	12.721	0.999856
GAD85:VP8Pep_IgA-NCK56:VP8Pep_IgA	1.00883	-9.44282	11.4605	1
Buffer:VP8Pep_IgG-NCK56:VP8Pep_IgA	-0.920706	-11.018	9.17655	1
NCK56:VP8Pep_IgG-NCK56:VP8Pep_IgA	2.73081	-7.36645	12.8281	0.998848
GAD85:VP8Pep_IgG-NCK56:VP8Pep_IgA	1.34866	-9.10299	11.8003	0.999999
Buffer:VP8Pep_IgG-GAD85:VP8Pep_IgA	-1.92953	-12.3812	8.52212	0.999971
NCK56:VP8Pep_IgG-GAD85:VP8Pep_IgA	1.72198	-8.72968	12.1736	0.999991
GAD85:VP8Pep_IgG-GAD85:VP8Pep_IgA	0.33983	-10.4546	11.1343	1
NCK56:VP8Pep_IgG-Buffer:VP8Pep_IgG	3.65151	-6.44574	13.7488	0.986128
GAD85:VP8Pep_IgG-Buffer:VP8Pep_IgG	2.26937	-8.18229	12.721	0.999856
GAD85:VP8Pep_IgG-NCK56:VP8Pep_IgG	-1.38215	-11.8338	9.06951	0.999999

[truncated: 3 more sheets: Table S11, Table S12, Table S13]
